# Supplementary material for: Economic evaluation of a Single use Flexible Digital Ureteroscope : Cost Analysis
Source: Research Square preprint supplement (doi:10.21203/rs.3.rs-5069441/v1), 2025-05-28
Supplement: Supplementary file 1 [file 47bd0ee4bef1c515b2d175b1.docx]

# Table 2: Patient Demographic Data, stone character and stone free rate:

| **Characteristic**  **Gender** | **Group A (n=59)** | **Group B (n=180)** | **P-value** | **Test of Significance**  Chi-square test |
| --- | --- | --- | --- | --- |
| - Male | 37 (63.2%) | 118 (65.5%) | 0.81 |  |
| - Female | 22 (36.8%) | 62 (34.5%) |  |  |
| **Diabetes Mellitus** |  |  |  | Chi-square test |
| - Diabetic | 12 (20.33%) | 33 (18.3%) | 0.88 |  |
| - Normal | 47 (76.7%) | 147 (81.7%) |  |  |
| **Hypertension** |  |  |  | Fisher's exact test |
| - Hypertensive | 2 (3.39%) | 11 (6.11%) | 0.53 |  |
| - Normal | 57 (96.61%) | 169 (93.89%) |  |  |
| **Degree of Hydronephrosis** |  |  |  | Fisher's exact test |
| - No/Mild | 55 (93.2%) | 164 (91.1%) | 0.79 |  |
| - Moderate/Severe | 4 (6.8%) | 16 (8.9%) |  |  |
| **Reoperation of Stone** |  |  |  | Chi-square test |
| - Yes | 15 (25.42%) | 29 (16.11%) | 0.16 |  |
| - No | 44 (74.6%) | 151 (83.9%) |  |  |
| **Stone Burden Measurement** |  |  |  |  |
| - Mean ± SD | 60 ± 14 | 67 ± 9 | 0.63 | Mann-Whitney test |
| **Stone Free Rate** |  |  |  |  |
| - Yes | 48 (81.4%) | 151 (83.9%) | 0.80 | Chi-square test |
| - No | 11 (18.6%) | 29 (16.11%) |  |  |
| **Stone distribution** |  |  |  |  |
| **Pelvic**  **Lower calyx**  **Middle calyx**  **Upper calyx**  **Mixed pelvic and calyces**  **Mixed calyces** | 12  5  1  2  30  9 | 30  19  3  8  92  28 |  | P value= 0.95 |
