# Supplementary material for: Economic evaluation of a Single use Flexible Digital Ureteroscope : Cost Analysis
Source: Research Square preprint supplement (doi:10.21203/rs.3.rs-5069441/v1), 2025-05-28
Supplement: Supplementary file 2 [file 9dfa0909222ef1819fc3eeba.docx]

Table (1): Cost of sterilization, packaging, and transport of reusable ureteroscopes per procedure

| Item | Cost ( SAR) (USD) |
| --- | --- |
| Pharmacy | 437 116 |
| Sterilization | 56.25 15 |
| Transportation | 30.75 8.2 |
| Paramedical staff | 75.25 20 |
